# Supplementary material
Source: Springer Nature journal article supplement (https://www.springermedizin.de/resource/supplementary/12943_2014_1391_MOESM12_ESM.pdf/9552854)

T T C C C G C C G C C T G G C C T G G C

**CBA**

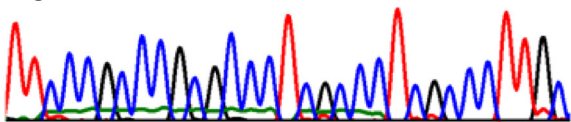

a

**BALB/c**

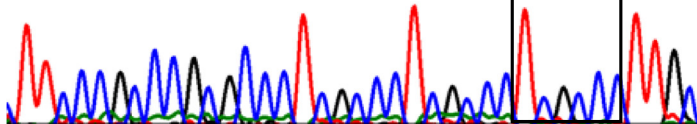

T T C C C G C C G C C T G G C C T G G C C T T G C

**TCGCCC  
InDel**

SP2 ATF E2F Ex1  
ATG

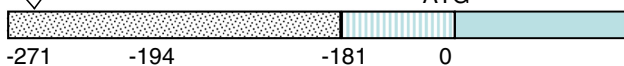

b

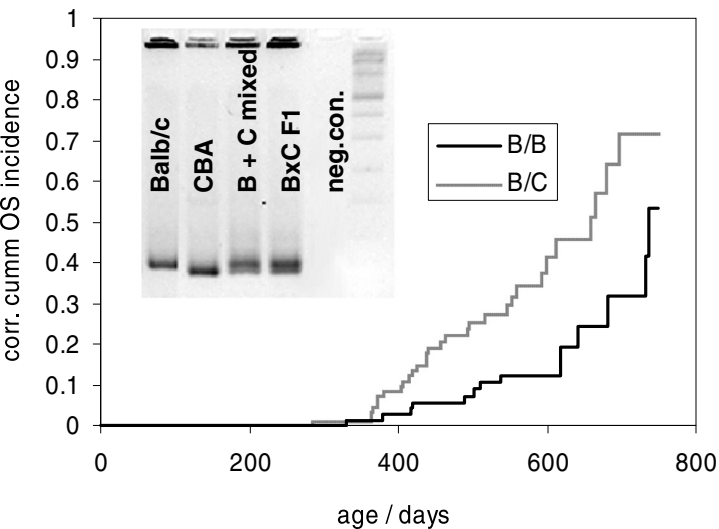

c

Supplement: MOESM12 [file 9552854]
